# Supplementary material
Source: PubMed Central journal article supplement (PMC3294165)
Supplement: NIHMS347299-supplement-Supp_Fig_S1-S3.pdf [file NIHMS347299-supplement-Supp_Fig_S1-S3.pdf]

## Supplemental Material for

## Detecting Local Ligand-Binding Site Similarity in Non-Homologues Proteins by Surface Patch Comparison

Lee Sael & Daisuke Kihara  
E-mail: [dkihara@purdue.edu](mailto:dkihara@purdue.edu)

### Figure S1. Partial matching algorithm for comparing surface patches of pockets.

Surface patches of the two pockets are matched according to the distance (dissimilarity) so that the total distance of the matched pairs is minimized. This is similar to the weighted bipartite matching problem, which can be approximately solved by the auction algorithm [1]. Since we want to obtain pairs of patches that minimize total distance while the original auction algorithm maximizes the total weight values of pairs, we defined the weight for a pair of patches as (*Constant-value – the Euclidean distance of the 3DZD vectors*). The pseudo code of the modified bipartite matching is shown below.

```
// Input: local surface patches of pocket A and pocket B, lpodA and lpodB.  
//      lpodA = [  $spd^A_0, spd^A_1, \dots, spd^A_{n_A}$  ], lpodB = [  $spd^B_0, spd^B_1, \dots, spd^B_{n_B}$  ]  
//      The number of patches in pocket A is larger than pocket B (i.e.  $n_A \geq n_B$ ) else they are reversed.  
// constant NUM is an arbitrary large value, larger than the maximum distance of patch pairs:  $NUM > d_{ij}$   
  
Initialization:  
  SET  $\delta \leftarrow 1/(n_A + 1)$  //  $\delta$  is to control minimum "bid" in the auction  
  Store all patches of lpodB  $i$  to queue  $Q \leftarrow i$   
  FOR  $j=1$  to  $n_A$  DO //initializing values for patches in lpodA  
    SET  $p_j \leftarrow 0$  and SET  $pair_j \leftarrow -1$   
    //  $p_j$  stores the minimum bid for  $spd^A_j$   
    //  $pair_j$  stores the ID of the paired patch from lpodB for  $spd^A_j$   
  ENDFOR  
  
Iteration:  
  WHILE  $Q$  is not empty AND number of iteration is less than  $10 \cdot n_A$   
    SET  $i \leftarrow$  value of front node in  $Q$  //choose  $spd^B_i$  for a query and remove it from  $Q$   
    Delete the front node of  $Q$   
    Find  $j$  ( $spd^A_j$ ) that maximizes  $w_{ij} - p_j$  where  $w_{ij}$  is  $NUM - d_{ij}$  //  $d_{ij}$  is the Euclidean distance of 3DZD  
    IF  $w_{ij} - p_j \geq 0$  THEN  
      Push current pair of  $j$ ,  $pair_j$ , into back of  $Q$   
      SET  $pair_j \leftarrow i$  //  $spd^B_i$  is assigned to  $spd^A_j$   
      Update  $p_j \leftarrow p_j + \delta$  //raise the minimum bid value for pairing with  $spd^A_j$   
    ENDIF  
  ENDWHILE  
  
Output:  
  Output pairs of ( $pair_j, j$ ) for all  $pair_j$  not equal to  $-1$ 
```

The algorithm works as follows: First all patches in pocket B is stored in the queue  $Q$ . The queue  $Q$  becomes empty when each patch in pocket B either finds a satisfying patch in pocket A or does not find any similar patch. No more than one patch in B is assigned to a patch in A. For a query patch  $spd^B_i$ , when it finds a similar patch,  $spd^A_i$ , the previous patch in B that paired with  $spd^A_i$  is put back to the  $Q$  and new patch in B,  $spd^B_i$  is assigned to  $spd^A_i$ . The patch in B which is put back to  $Q$  has another round to be evaluated to find a patch in A. When patches are competed for a same  $spd^A_i$ , the value  $p$  for  $spd^A_i$  is increased, so that at the end a patch in B that is most similar to  $spd^A_i$  will be selected for its pair. This is the intention of raising the minimum bid value,  $p_j$ , at each iteration. In the end, the algorithm output the pairs of patches that minimize the overall distance between the patches in A and B.

**Figure S2. Prediction success rates of different weight values.** **A** shows the top-3 prediction rates for different combination of weight  $w_1$ , in Equation 8, and weight  $w_2$ , in Equation 9, are plotted. All four features, SHEV, were used. **B** shows the effect of removing  $n_A/N$  terms in Equation 6 and 7 with varying weights  $w_1$  and  $w_2$ .

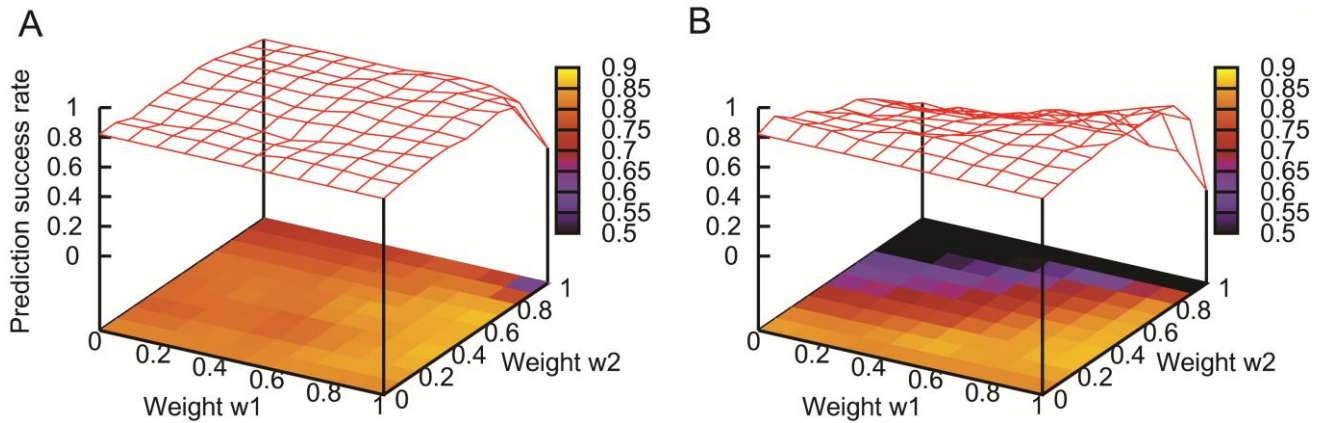

**Figure S3. Prediction rate of different k-values on the Kahraman dataset.** The prediction rates for different k value in Equation 11 are shown.

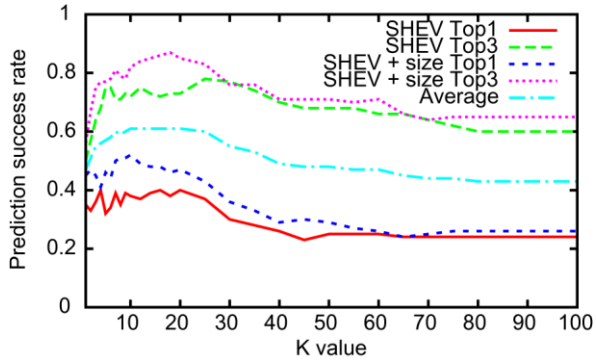

**References**

Demange, G.; Gale, D.; Sotomayor, M. Multi-Item Auctions. *The Journal of Political Economy* **1986a**, *94*, 863–872.
